# Supplementary material for: Cancer-associated fibroblasts induce sorafenib resistance of hepatocellular carcinoma cells through CXCL12/FOLR1
Source: Springer Nature journal article supplement (doi:10.1186/s12885-023-11613-8), 2023-12-06

Figure 3. Full Length blots

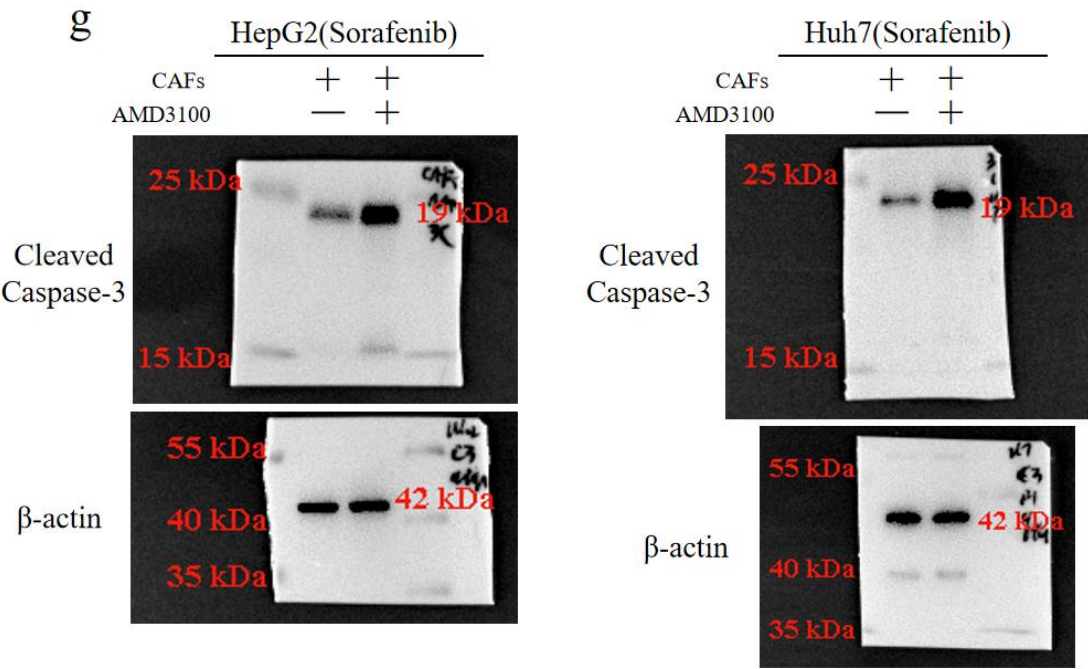

Figure 4. Full Length blots

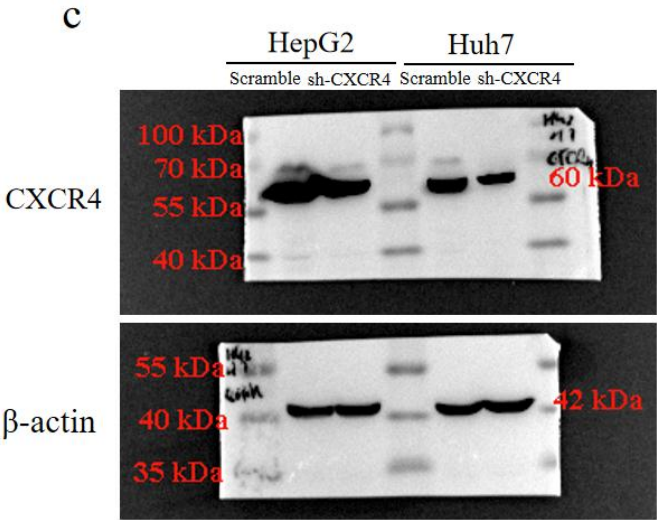

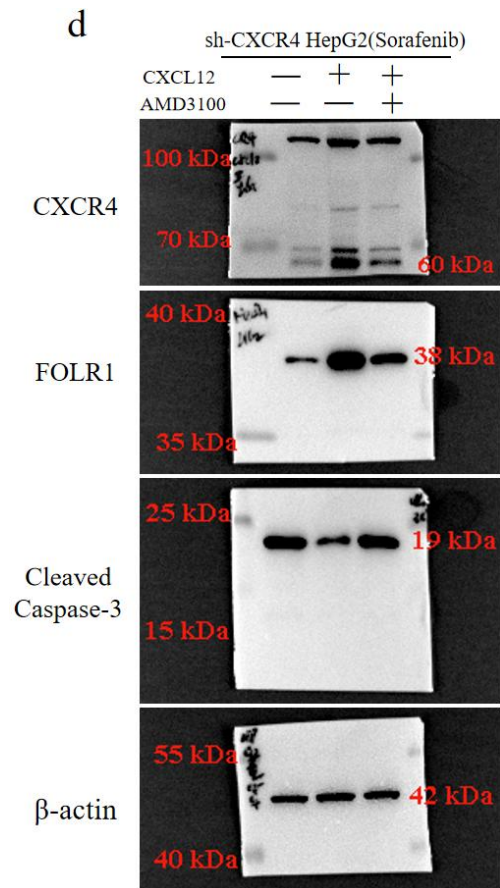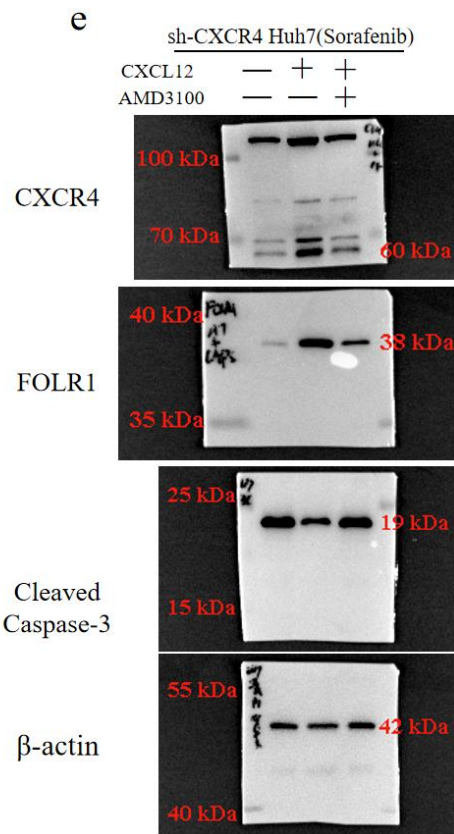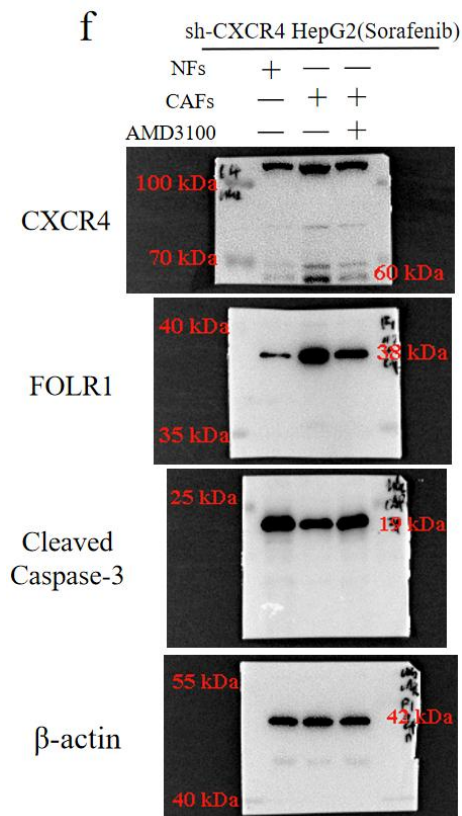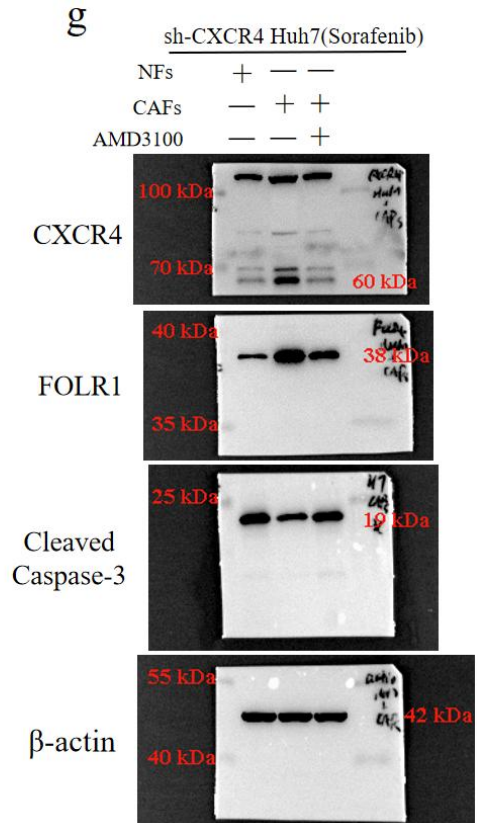

j

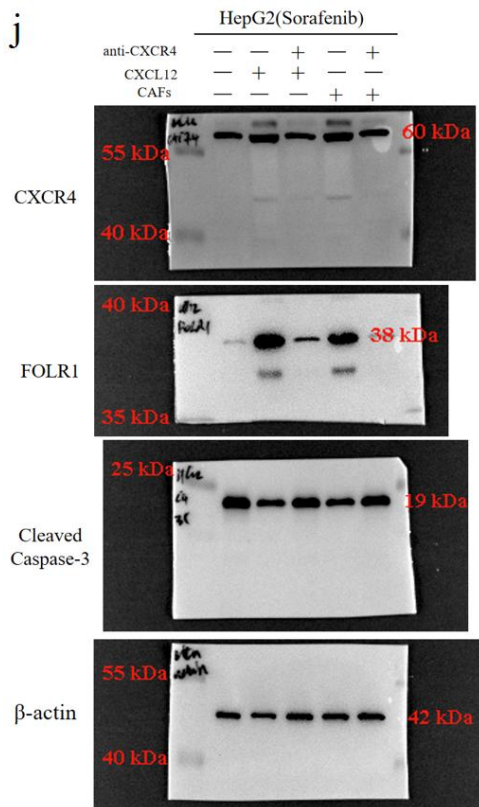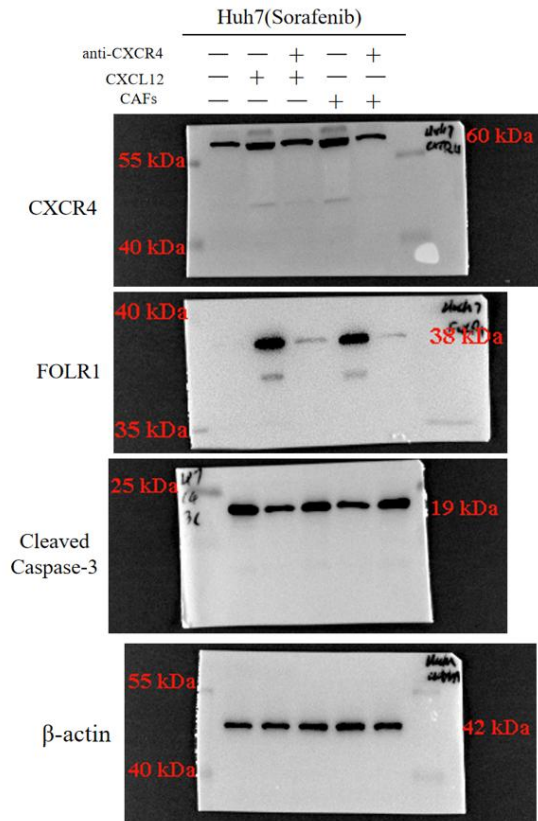

Supplement: MOESM1 [file 12885_2023_11613_MOESM1_ESM.pdf]
